# Supplementary material
Source: Springer Nature journal article supplement (https://www.springermedizin.de/resource/supplementary/13221_2014_85_MOESM1_ESM.pdf/9680930)
Supplement: MOESM1 [file 9680930]

**Table S1. Distribution of CSF-1R<sup>high</sup> cells before and after the cell enrichment process**

| Cell line   | Subpopulation          | % CSF-1R <sup>low</sup> | % CSF-1R <sup>high</sup> |
|-------------|------------------------|-------------------------|--------------------------|
| <b>COSB</b> | Monolayer              | 98.4                    | 1.68                     |
|             | CSF-1R <sup>low</sup>  | 96.6                    | 3.41                     |
|             | CSF-1R <sup>high</sup> | 77.4                    | 22.5                     |
| <b>DD-1</b> | Monolayer              | 98.5                    | 1.46                     |
|             | CSF-1R <sup>low</sup>  | 92.8                    | 7.11                     |
|             | CSF-1R <sup>high</sup> | 56.4                    | 43.4                     |
| <b>AS5</b>  | Monolayer              | 98.5                    | 1.16                     |
|             | CSF-1R <sup>low</sup>  | 96.2                    | 3.27                     |
|             | CSF-1R <sup>high</sup> | 78.1                    | 21.7                     |

**Table S2. Approximate EC<sub>50</sub> and confidence interval values (95%) for the monolayer, CSF-1R<sup>low</sup> and CSF-1R<sup>high</sup> cell populations in response to doxorubicin treatment**

| Cell line   | Cell population        | Approximate EC <sub>50</sub> [nM] | Confidence interval [nM] |
|-------------|------------------------|-----------------------------------|--------------------------|
| <b>COSB</b> | Monolayer              | 104.6                             | 60.1 – 181.9             |
|             | CSF-1R <sup>low</sup>  | 65.1                              | 40.3-105.4               |
|             | CSF-1R <sup>high</sup> | 197.4                             | 136.1 - 285.8            |
| <b>DD-1</b> | Monolayer              | 198.9                             | 156.3 – 254.7            |
|             | CSF-1R <sup>low</sup>  | 176.9                             | 82.4 - 379.3             |
|             | CSF-1R <sup>high</sup> | 1255.1                            | 638.3 - 2471             |
| <b>AS5</b>  | Monolayer              | 107.4                             | 25.1 - 402.7             |
|             | CSF-1R <sup>low</sup>  | 94.1                              | 17.8 - 496.6             |
|             | CSF-1R <sup>high</sup> | 275.2                             | 70.8 - 1069              |

**Table S3. Intracellular LysoTracker fluorescence detected in CSF-1R cell populations presented as the range of fold change in CSF-1R<sup>high</sup>/CSF-1R<sup>low</sup> relative fluorescent values (n = 2 for each cell line)**

| Cell line   | LysoTracker Concentration [nM] | Range of fold change (CSF-1R <sup>high</sup> /CSF-1R <sup>low</sup> ) | Mean |
|-------------|--------------------------------|-----------------------------------------------------------------------|------|
| <b>COSB</b> | 5                              | 1.7-2.5                                                               | 2.1  |
|             | 10                             | 1.4-1.5                                                               | 1.5  |
|             | 25                             | 1.2-1.9                                                               | 1.5  |
|             | 50                             | 1.4-1.6                                                               | 1.5  |
|             | 100                            | 1.5-1.9                                                               | 1.7  |
| <b>AS-5</b> | 5                              | 1.3-1.7                                                               | 1.5  |
|             | 10                             | 2.0-3.1                                                               | 2.5  |
|             | 25                             | 1.6-1.9                                                               | 1.8  |
|             | 50                             | 1.5-1.8                                                               | 1.6  |
